# Supplementary material for: EKONT-2: advancement of a demonstrator for dry–mechanical decontamination of corners and inner edges in nuclear facilities
Source: Copernicus journal article supplement (doi:10.5194/sand-2-15-2023), 2023-09-06
Supplement: Supplementary file 1 [file sand-2-15-2023-supplement.pdf]

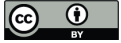

*Supplement of*

## **EKONT-2: advancement of a demonstrator for dry–mechanical decontamination of corners and inner edges in nuclear facilities**

**Eric Rentschler et al.**

*Correspondence to:* Eric Rentschler ([eric.rentschler@kit.edu](mailto:eric.rentschler@kit.edu))

The copyright of individual parts of the supplement might differ from the article licence.

## EKONT-2: Advancement of a demonstrator for dry-mechanical decontamination of corners and inner edge in nuclear facilities

Eric Rentschler, Sascha Gentes, Martin Villinger, Kurt Heppler, Stefan Stemmler, Johannes Greb

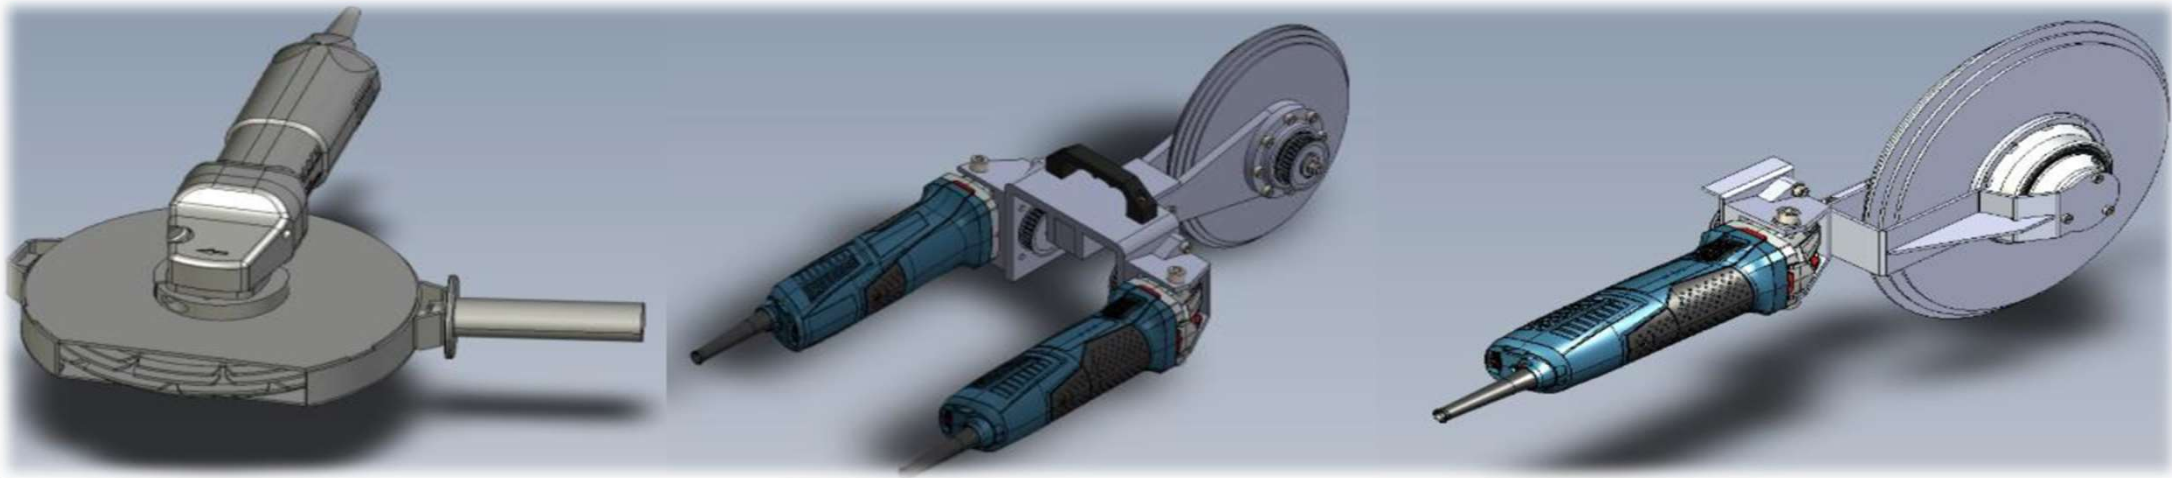

# Contents

- Project partners
- Basics about EKont
- Currently used tools
- Developed Cutting technologies
- Test bench and research investigations
- Conclusion and Outlook

SPONSORED BY THE

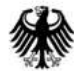

Federal Ministry  
of Education  
and Research

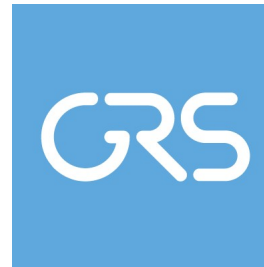

## Project Partners

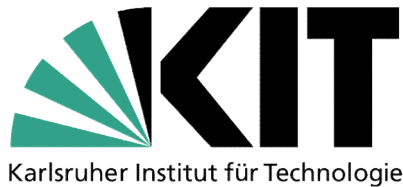

- Partner for research, design of the test bench and experiment series

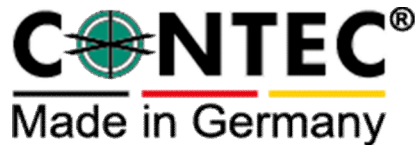

- Industry partner, expert in concrete surface work and diamond cutting

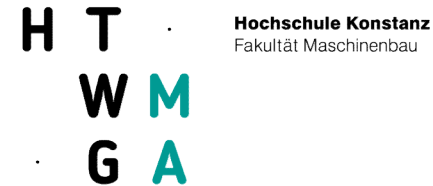

- Partner for research in mechanical engineering and design of demonstrators

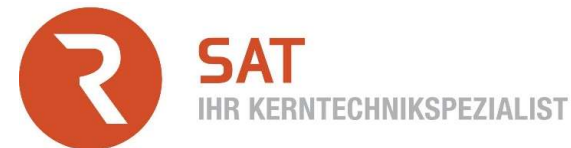

- Industry partner, expert in nuclear dismantling, decommissioning and decontamination

## Basics about EKont

- Development of an innovative, semi-automated demonstrator for dry-mechanical decontamination of corners, edges and impurities for nuclear facilities (01.08.2019 – 30.06.2023)
- Comparison of the performance parameters
- Development and construction of new demonstrators
- **Follow-up research project: EKONT-2 (01.07.2023–30.06.2026), Advancement of a demonstrator for dry-mechanical decontamination of corners and inner edge in nuclear facilities**

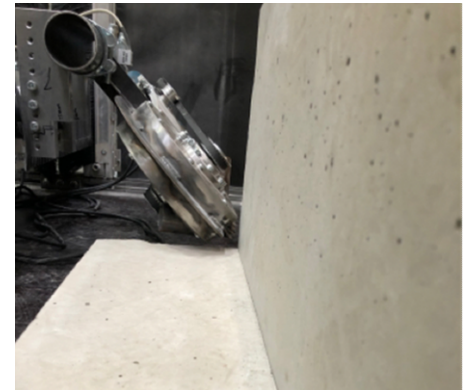

# Currently used tools

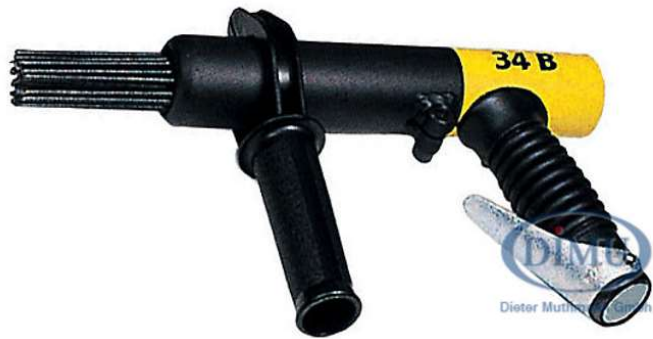

needle gun DIMU type 34 B [1]

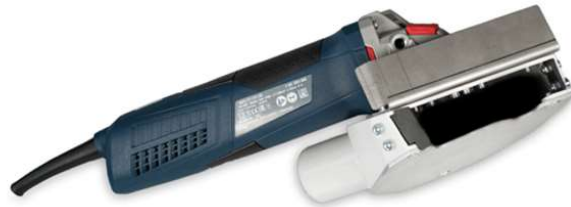

Currently used tools A:  
B: milling tool enviro C25 [2]

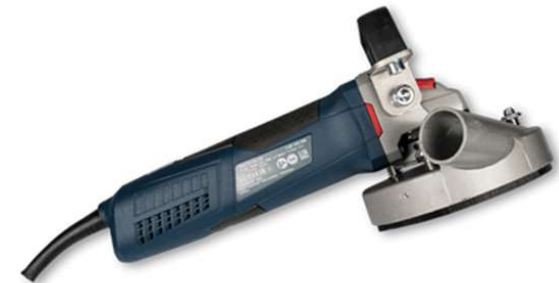

C: concrete grinder enviro ASM 125 [3]

Source: [1] Dieter Muthmann GmbH; <https://www.dimu.de/nadelpistole-typ-34-b.html>. [Accessed 08 06 2021].  
[2] ASUP GmbH; <https://asup.info/marken/enviro/enviro-eckfraese-c25>. [Accessed 08 06 2021].  
[3] ASUP GmbH; <https://asup.info/marken/enviro/enviro-hand-schleifmaschine-asm-125>. [Accessed 08 06 2021].

## Developed Cutting technologies

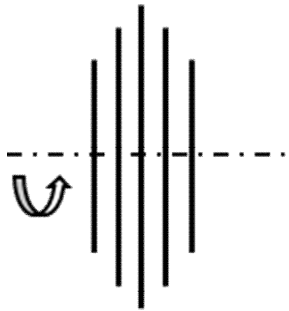

a) Step cutter with co-rotating direction

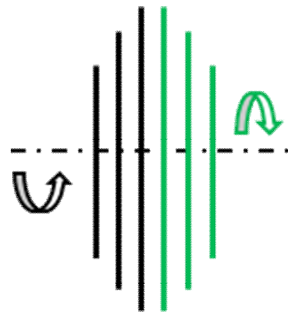

b) Step cutter with contrary direction of rotation

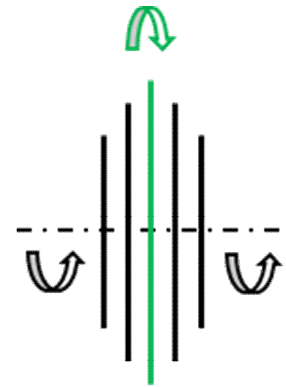

c) Step cutter with concentric contrary direction of rotation

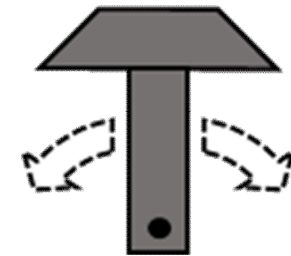

d) Oscillating toolhead

## New developed prototypes

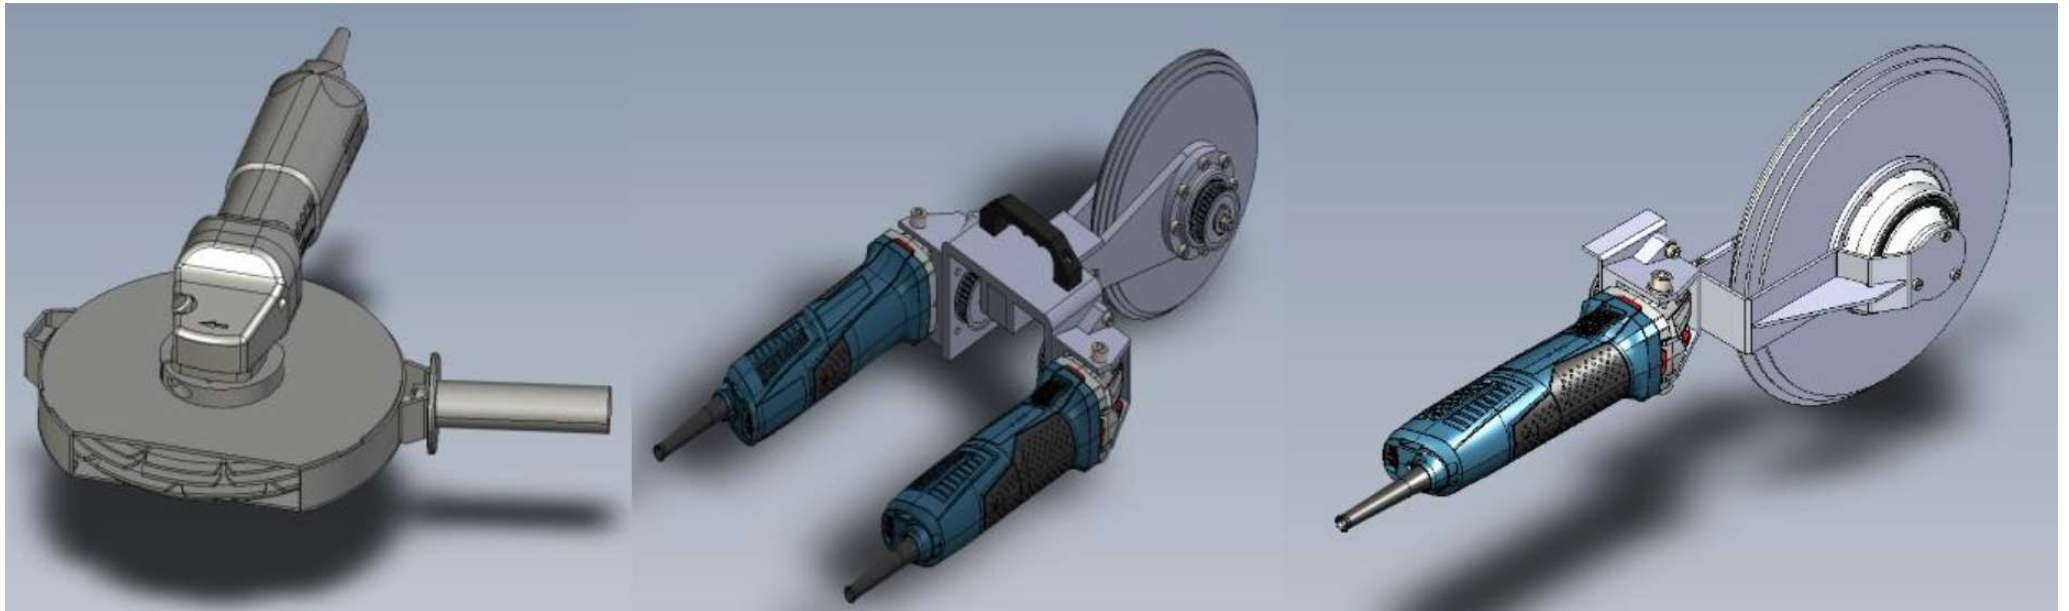



# Technical design of the test bench

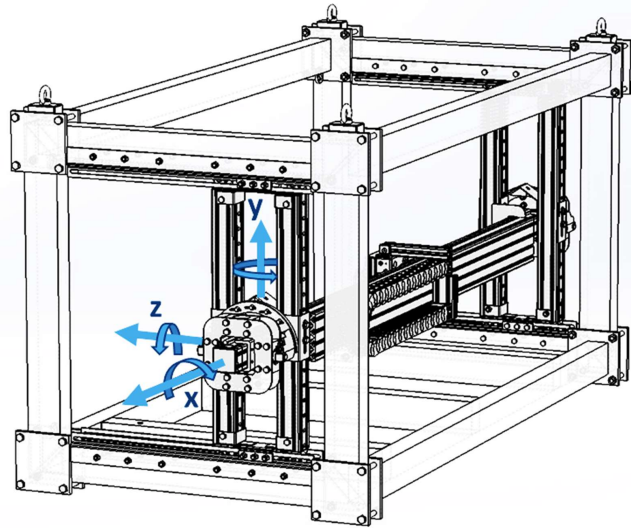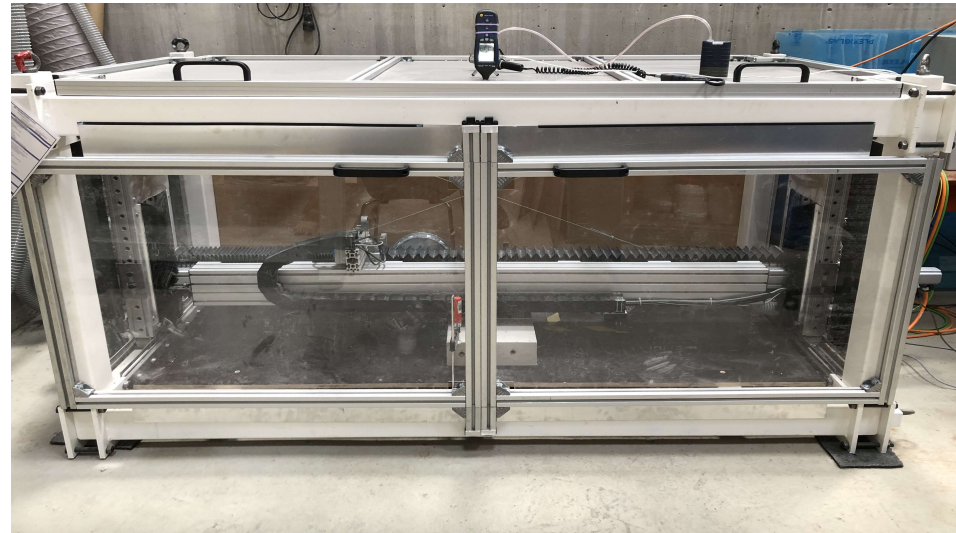

## Technical design of the test bench

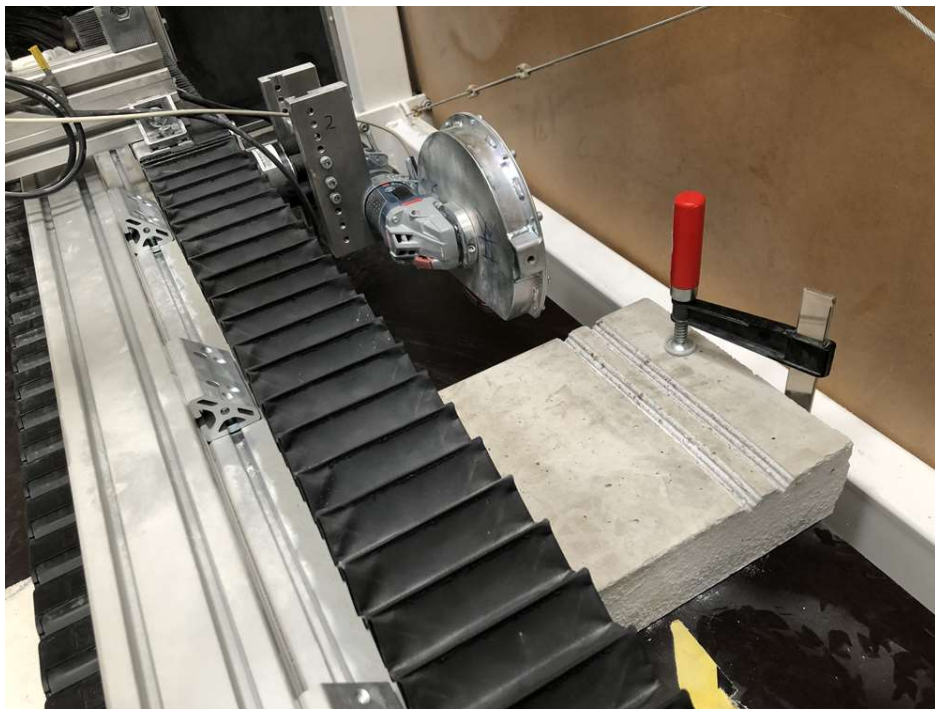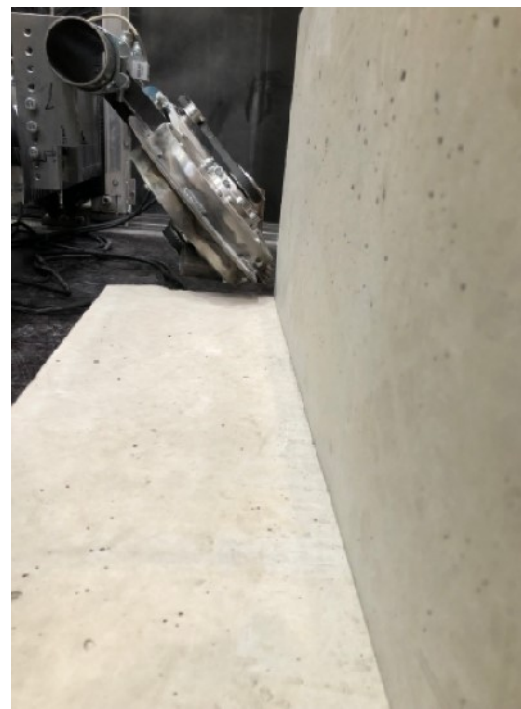

Tool holder with prototype A (left) and prototype B (right)

## Scientific Investigations and experimentally collected performance parameters

### ■ Internal factors

- Feed rate (*Linear unit*)
- Removal depth per operation (*Kardan joints*)
- Direction of rotation
- Direction of operation

### ■ External factors

- Forces and torques (*6-axis sensor*)
- Surface roughness (*Laser scanner*)
- Vibrations (*Vibration meter*)
- Sound level (*sound level meter*)
- Demonstrator weight
- Amount of dust (*real-time dust monitor*)
- Particulate matter (*grainsize measur*)

# Test Series

Over 70 test and experiment series with average 6 tested parameters  
 = more than 420 data series

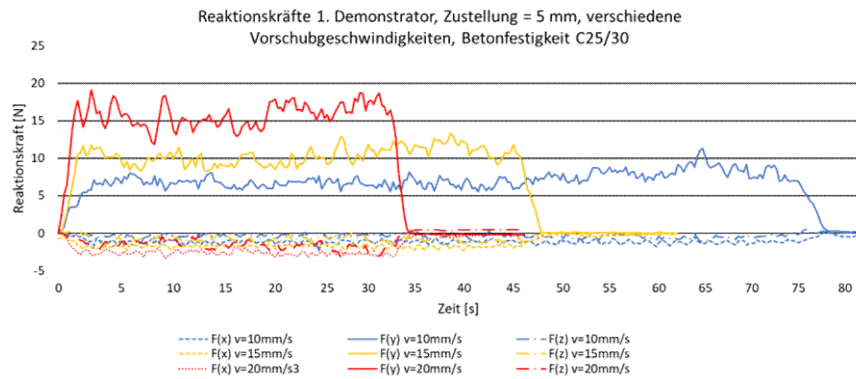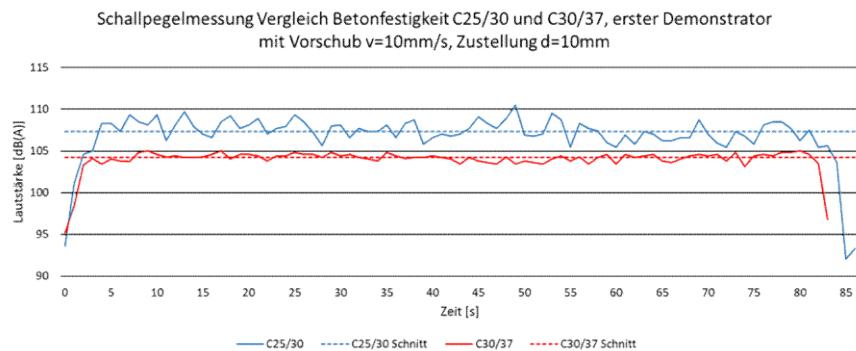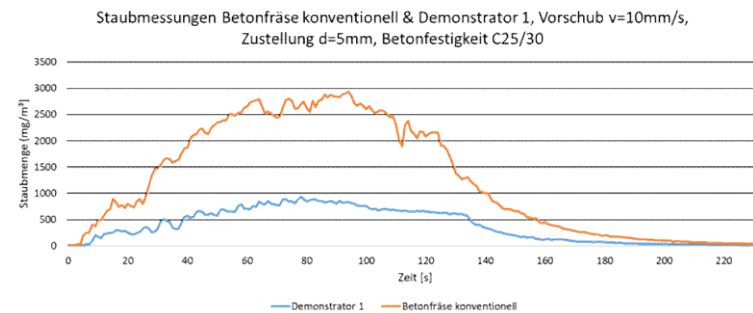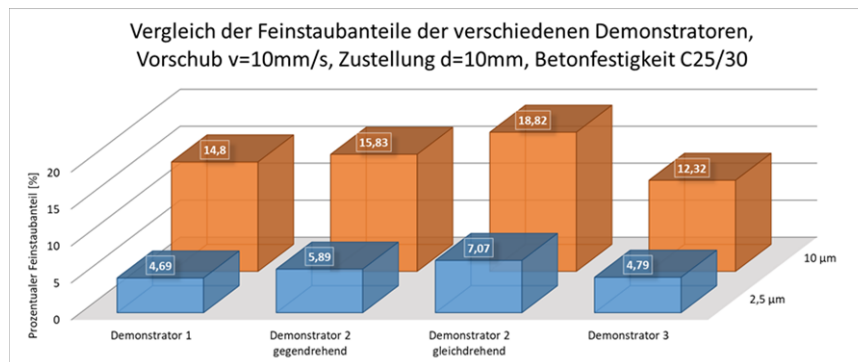

## Step cutter with co-rotating direction

- Five diamond discs
- All discs co-rotating in one direction
- One engine

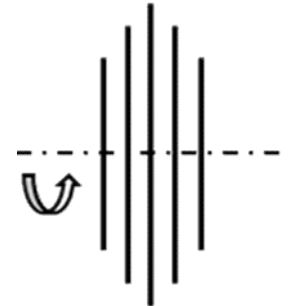

| +                   | -           |
|---------------------|-------------|
| Forces              | Vibrations  |
| Amount of dust      | Sound level |
| Demonstrator weight |             |
| Particle matter     |             |
| Surface roughness   |             |

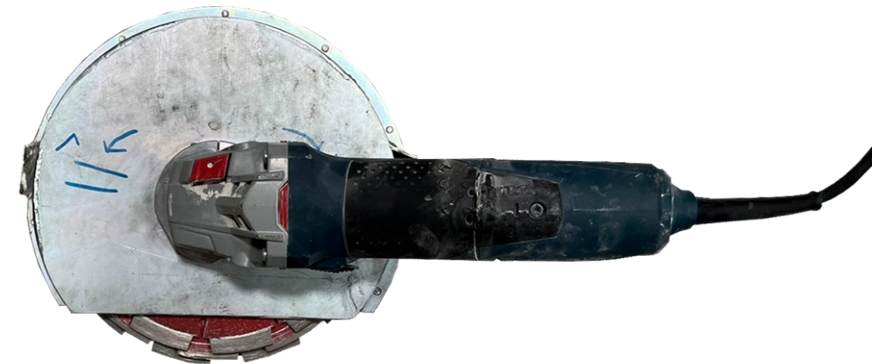

## Step cutter with contrary direction of rotation

- Six diamond discs
- Contrary direction of rotation
- Two engines

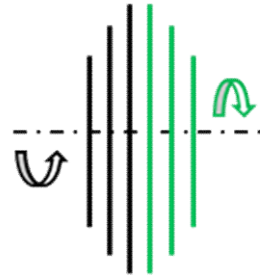

| +           | -                   |
|-------------|---------------------|
| Sound level | Amount of dust      |
| Vibrations  | Demonstrator weight |

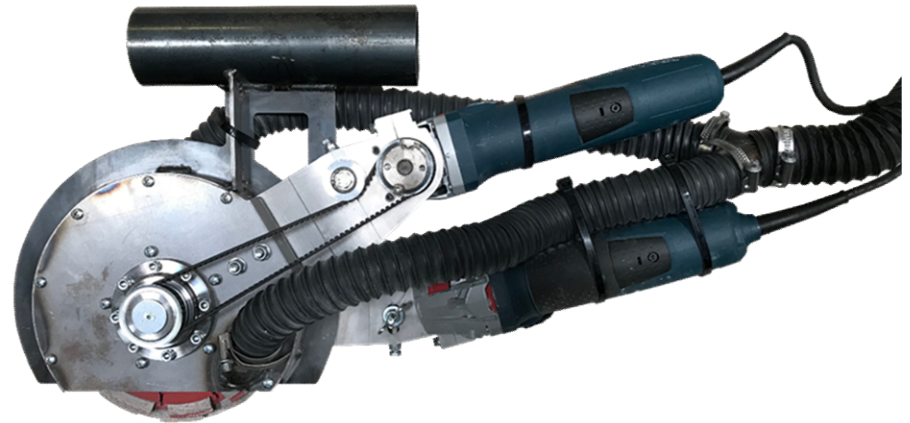



## Step cutter with concentric contrary direction of rotation

- Five diamond discs
- Concentric (middle) disc contrary direction of rotation
- One engine

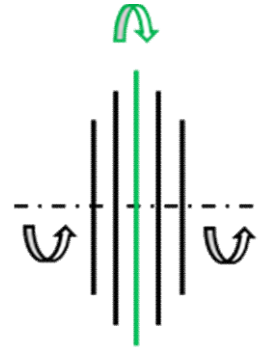

| +               | -                   |
|-----------------|---------------------|
| Amount of dust  | Demonstrator weight |
| Particle matter | Surface roughness   |
|                 | Sound level         |

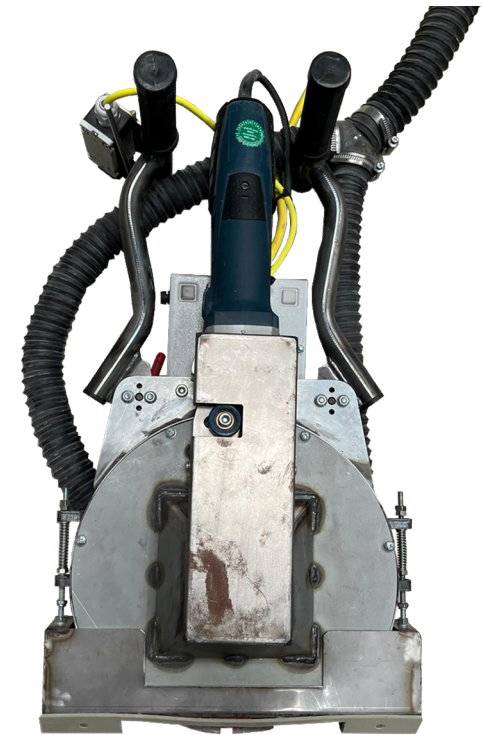

## Oscillating toolhead

- Diamond head for corners and inner edges
- Oscillating (vibrating) toolhead
- One engine

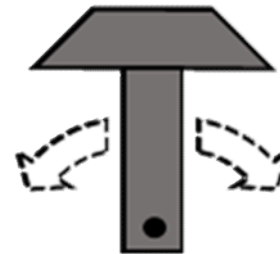

| +                   | -             |
|---------------------|---------------|
| Demonstrator weight | Feed rate     |
| Inner corners       | Removal depth |
|                     | Vibrations    |

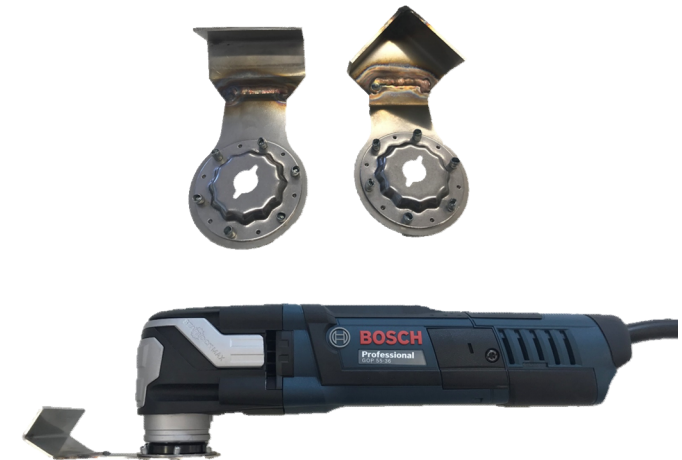



# Laser scanning

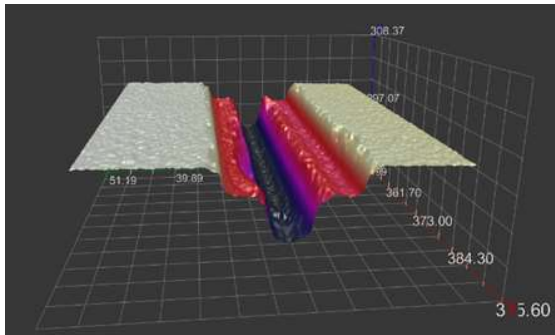

a) Step cutter with co-rotating direction

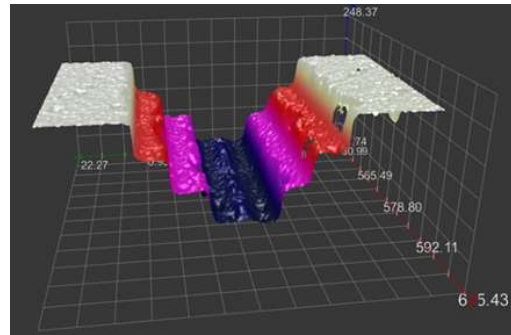

b) Step cutter with contrary direction of rotation

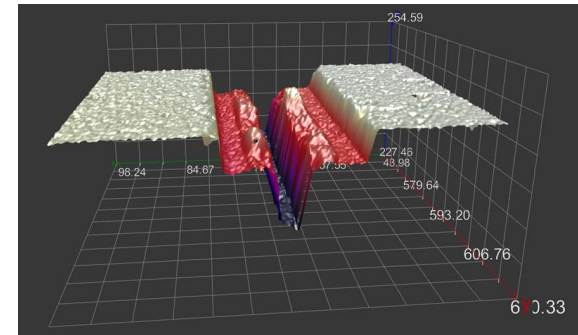

c) Step cutter with concentric contrary direction of rotation

# Laser scanning

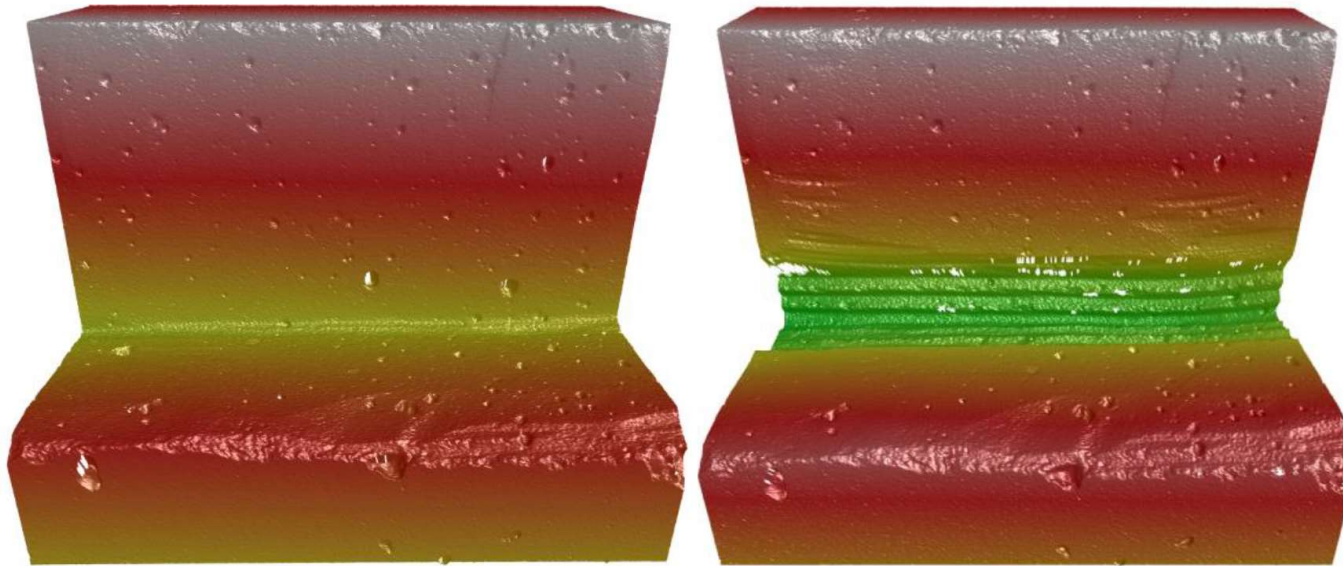

3D displays for the inner edge before (left) and after (right) the test with the prototype A

## Practice tests at Nuclear Power Plant Obrigheim

|                     |   | Ergonomics                           | Performance | Surface Roughness            |
|---------------------|---|--------------------------------------|-------------|------------------------------|
| Step Cutter         | 1 | Good                                 | Very good   | Very good                    |
|                     | 2 | Demonstrator<br>-weight too<br>heavy |             | Good                         |
|                     | 3 |                                      |             | Leftover Concrete<br>Bridges |
| Oscillating<br>Tool | 4 | Good                                 | Too low     | Very good                    |

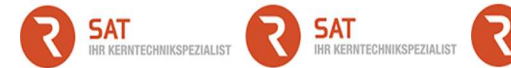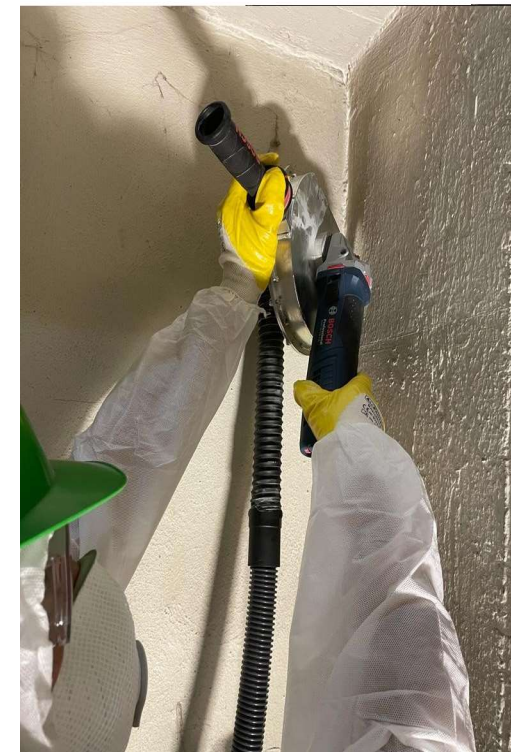

## Conclusion EKont and Outlook EKONT-2

- **„Keep the good things and improve the bad things“**
  - The research project delivered four fully working demonstrators
  - The test bench showed, which demonstrator performs well in a specific field
    - Forces and torques, Sound level, Vibrations, Surface roughness, Dust, etc...
  - The tests on site of the NPP showed, which aspects are really important
    - E.g. Demonstrator weight for the Nuclear Site workers
  
- **Future planned improvements in the development:**
  - Tool weight
  - Dimensions of the tools
  - Surface quality especially for clearance measurement
  - Exact depth performance
  - Overall safety improvements for workers

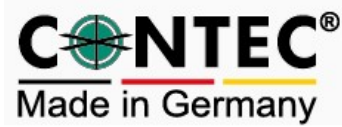

H  
T  
W  
G

Hochschule Konstanz  
Technik, Wirtschaft und Gestaltung

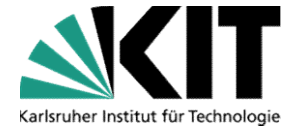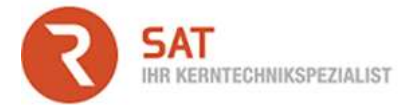

# Thank you for your attention

SPONSORED BY THE

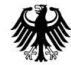

Federal Ministry  
of Education  
and Research

Contact:  
Eric Rentschler  
+49 721 608 44121  
[Eric.rentschler@kit.edu](mailto:Eric.rentschler@kit.edu)
